# Supplementary material
Source: MDPI journal article supplement (https://www.mdpi.com/2076-3263/13/6/161)
Supplement: s1 [file s1]

Archive with 7 entries (7 files):
- geosciences-2324741-supplementary.pdf
- Video S1.gif
- Video S2.gif
- Video S3.gif
- Video S4.gif
- Video S5.gif
- Video S6.gif
