# Supplementary material
Source: MDPI journal article supplement (https://www.mdpi.com/2076-3263/13/6/161)

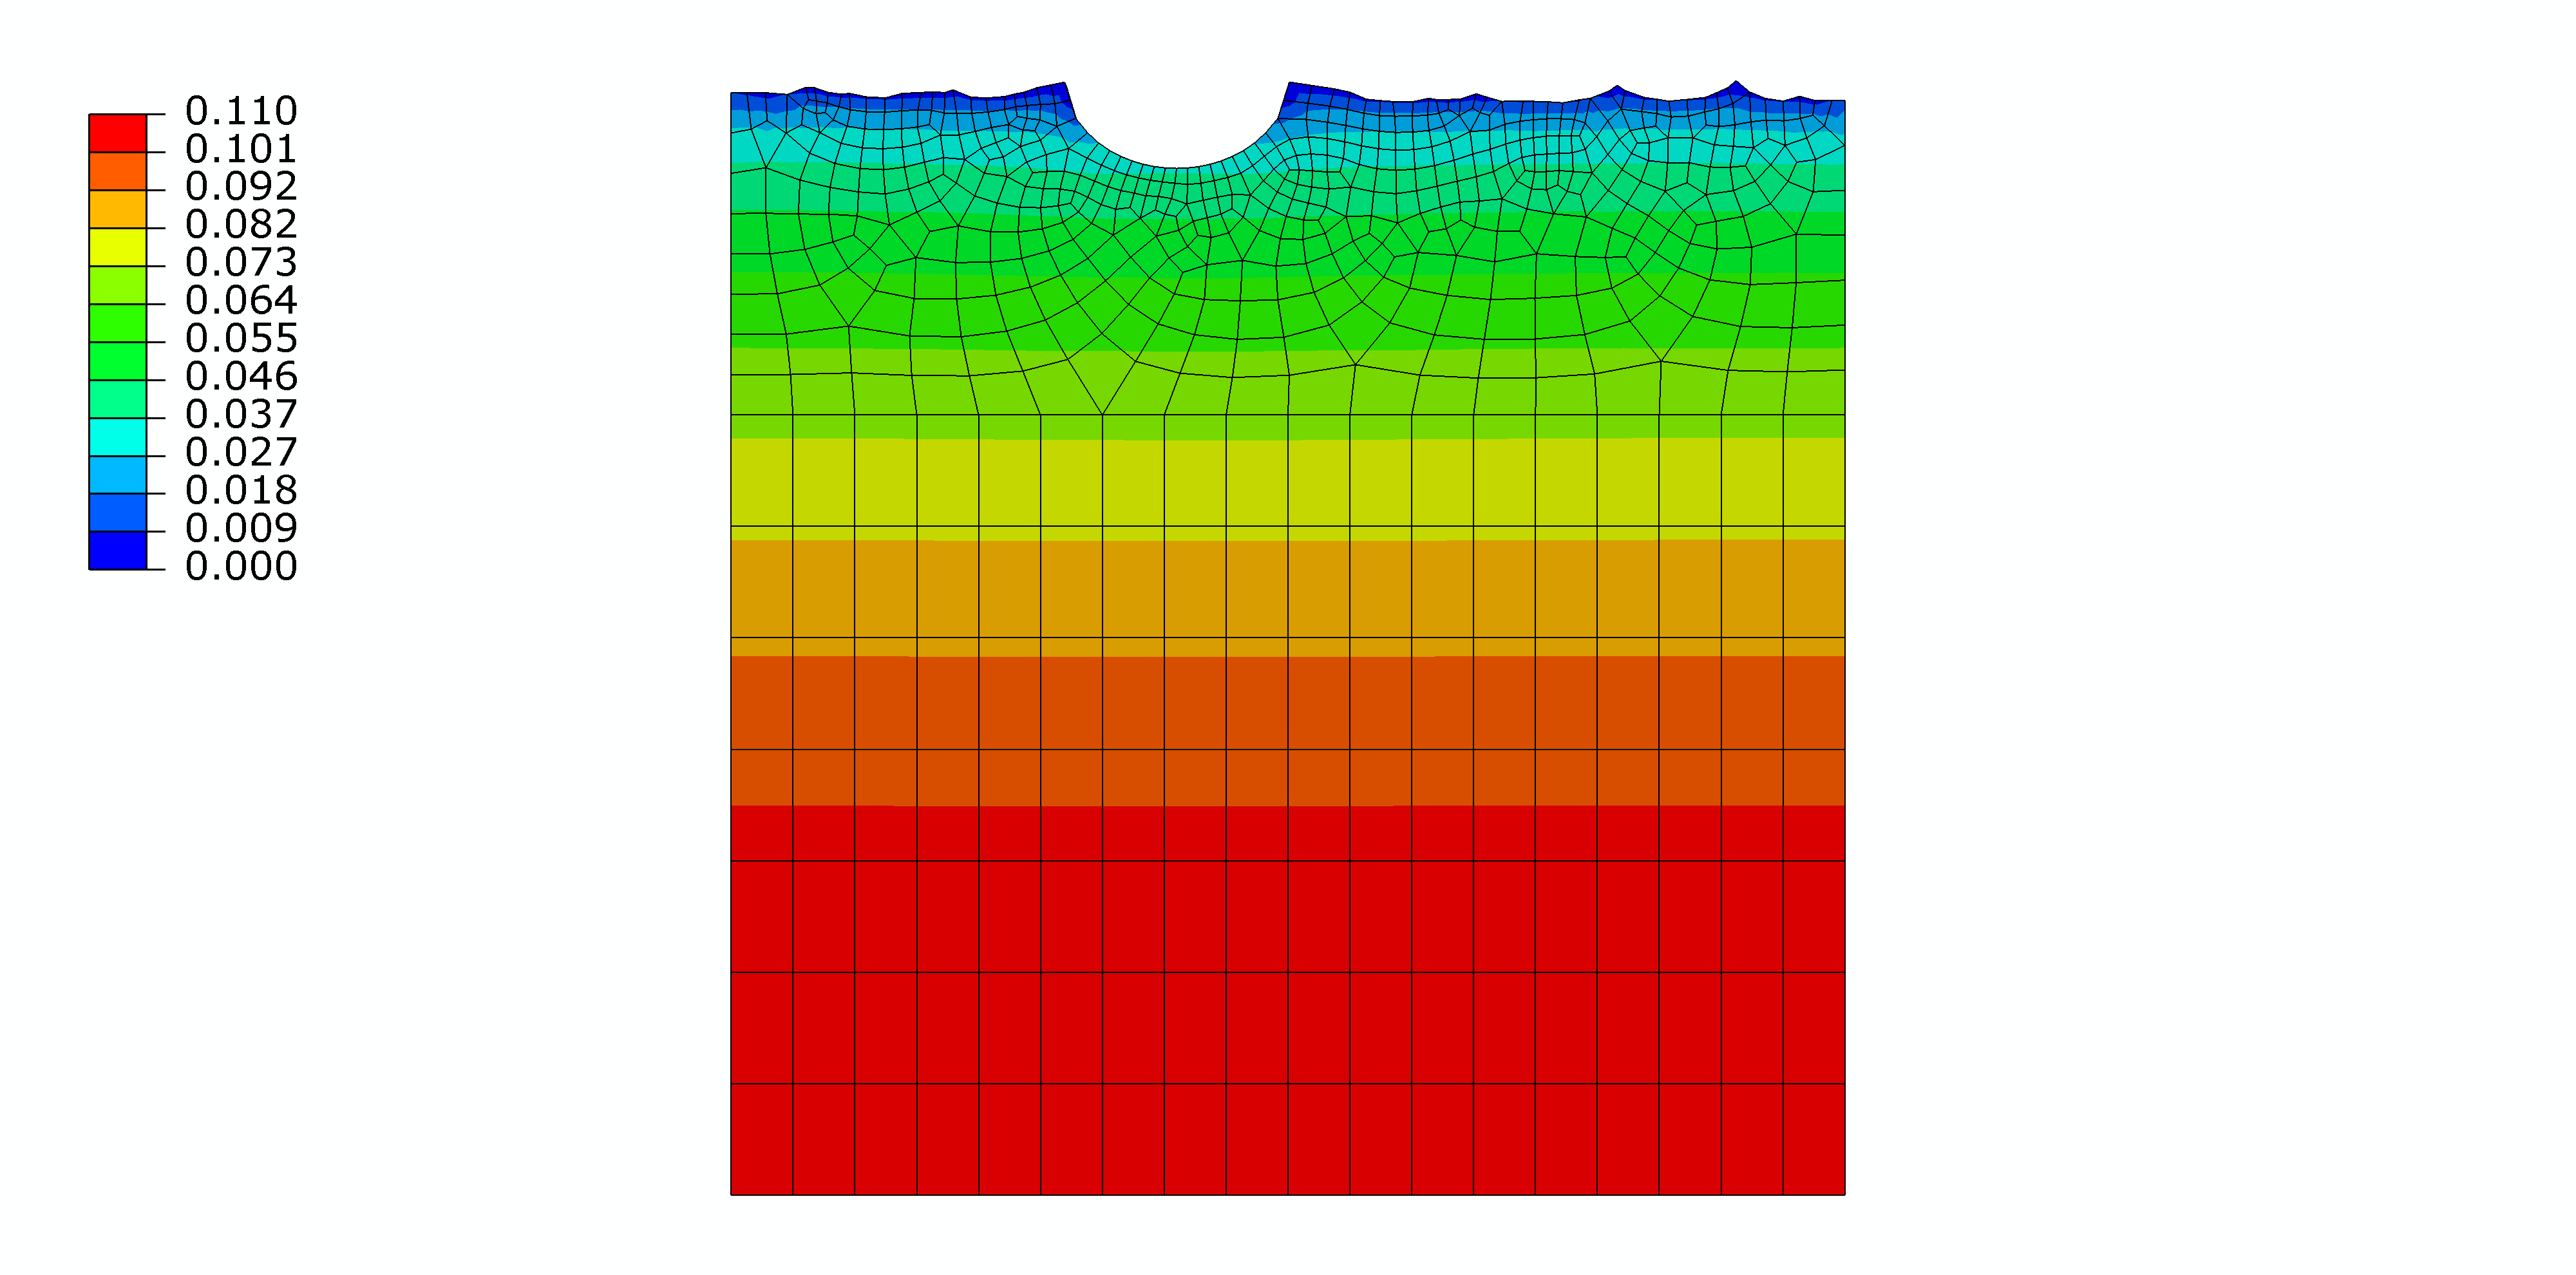

Supplement: s1 [file s1 › Video S1.gif]

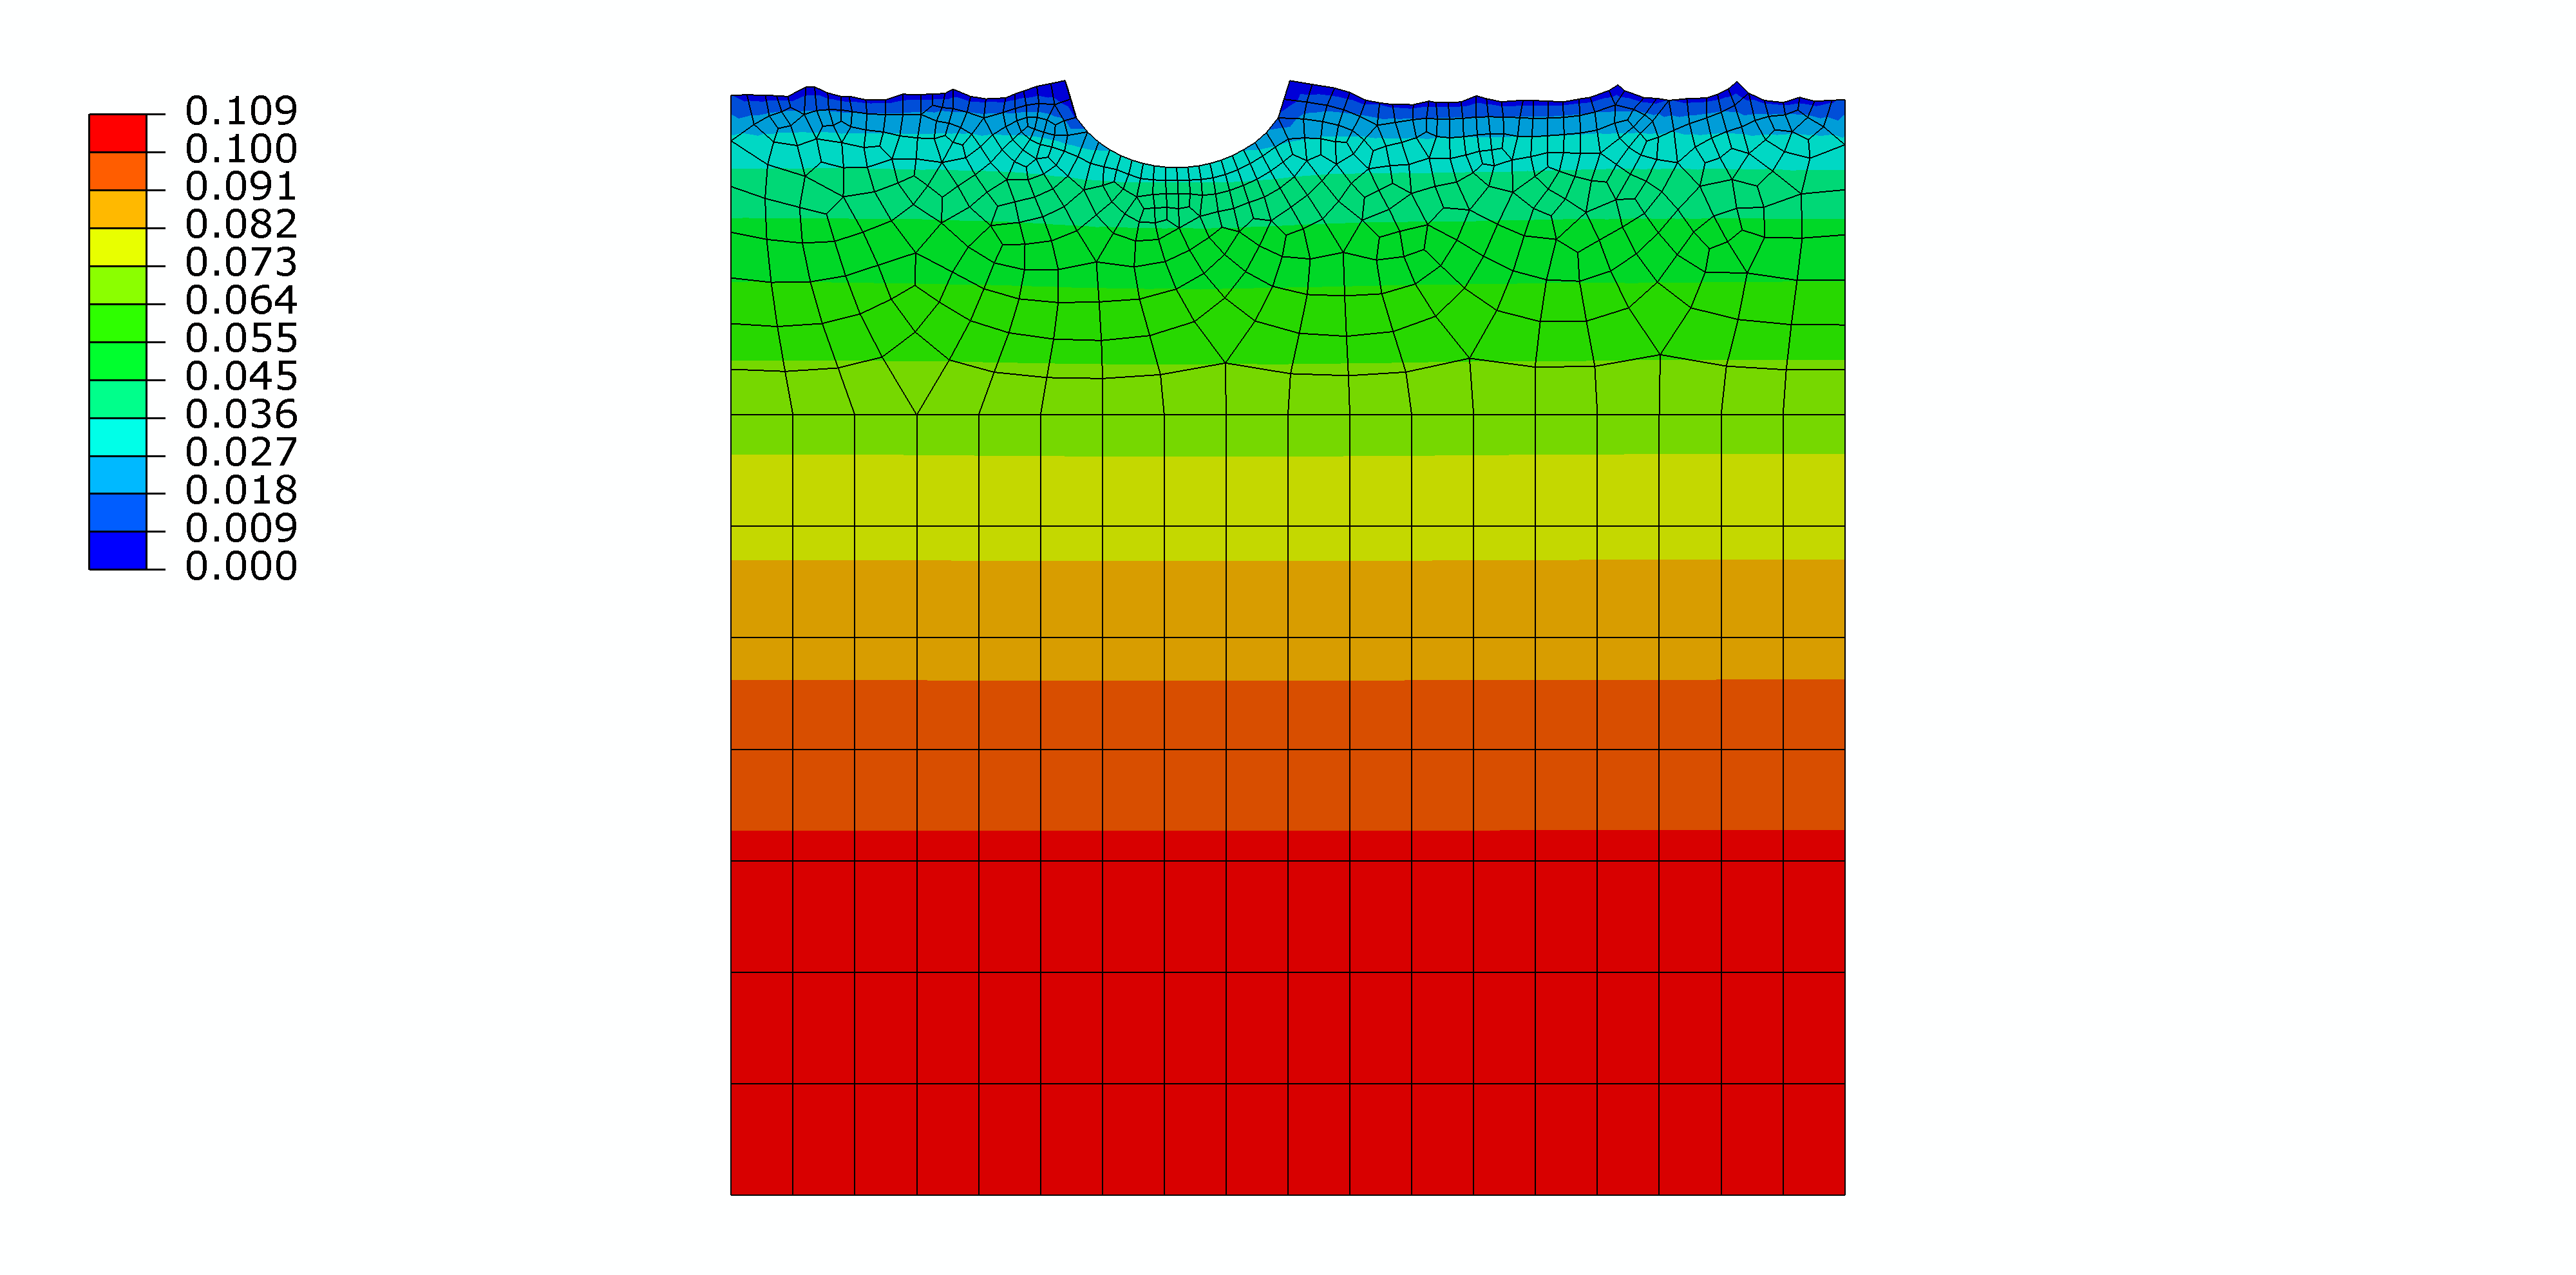

Supplement: s1 [file s1 › Video S2.gif]

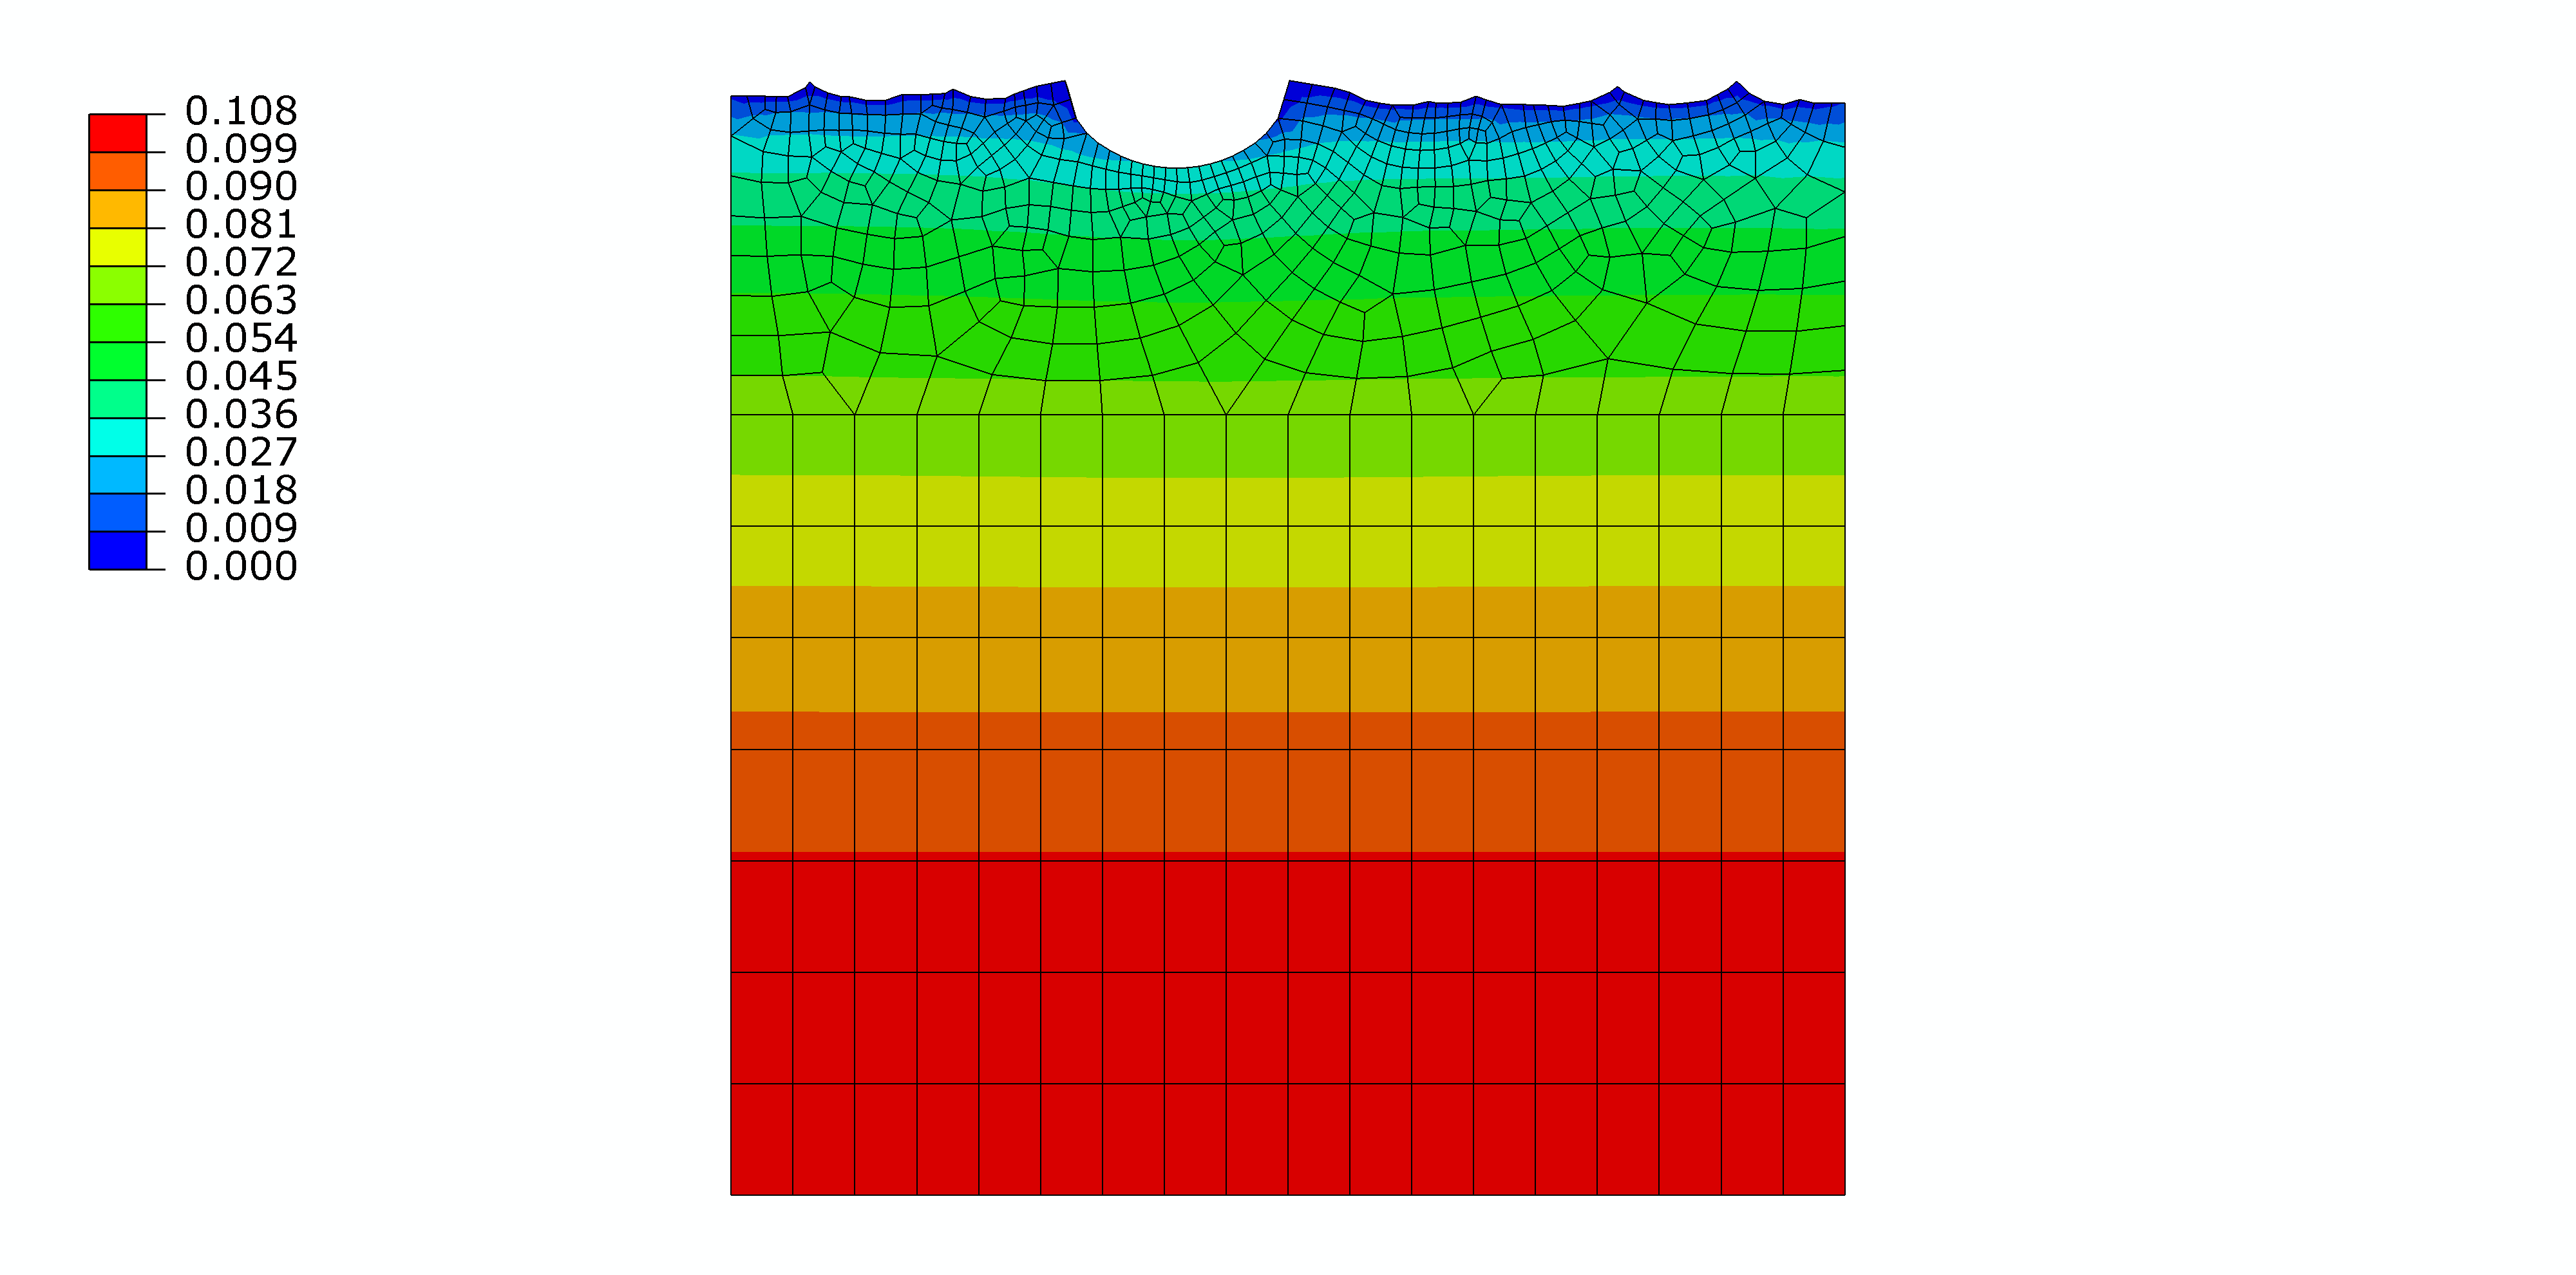

Supplement: s1 [file s1 › Video S3.gif]

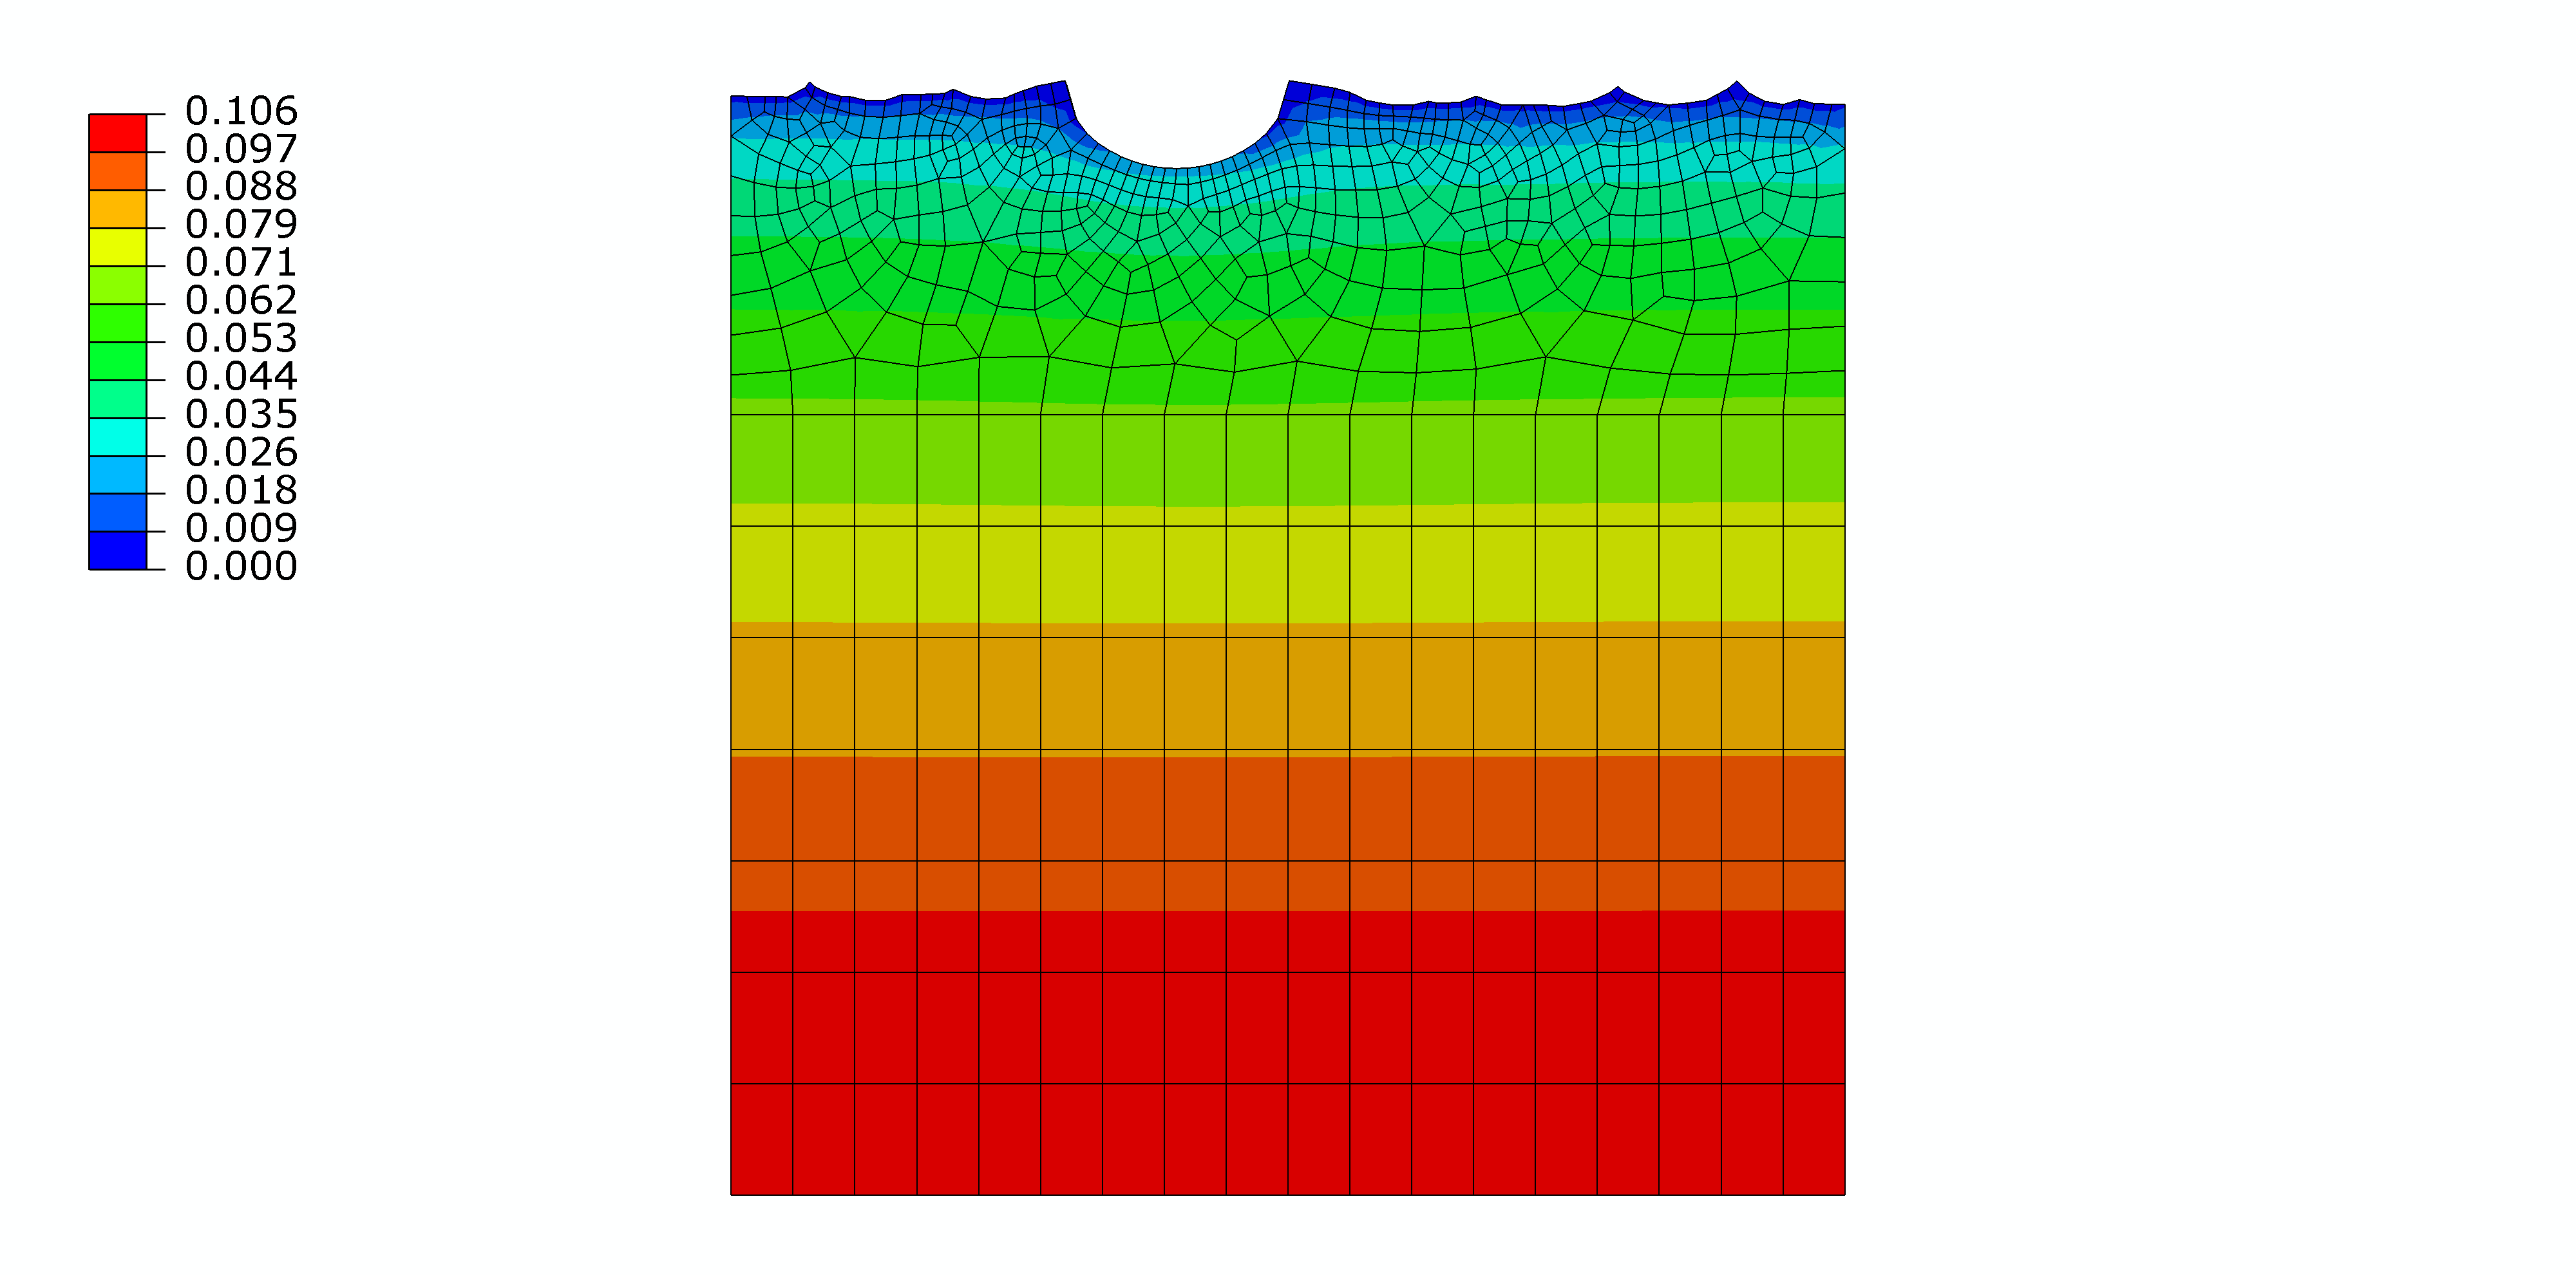

Supplement: s1 [file s1 › Video S4.gif]

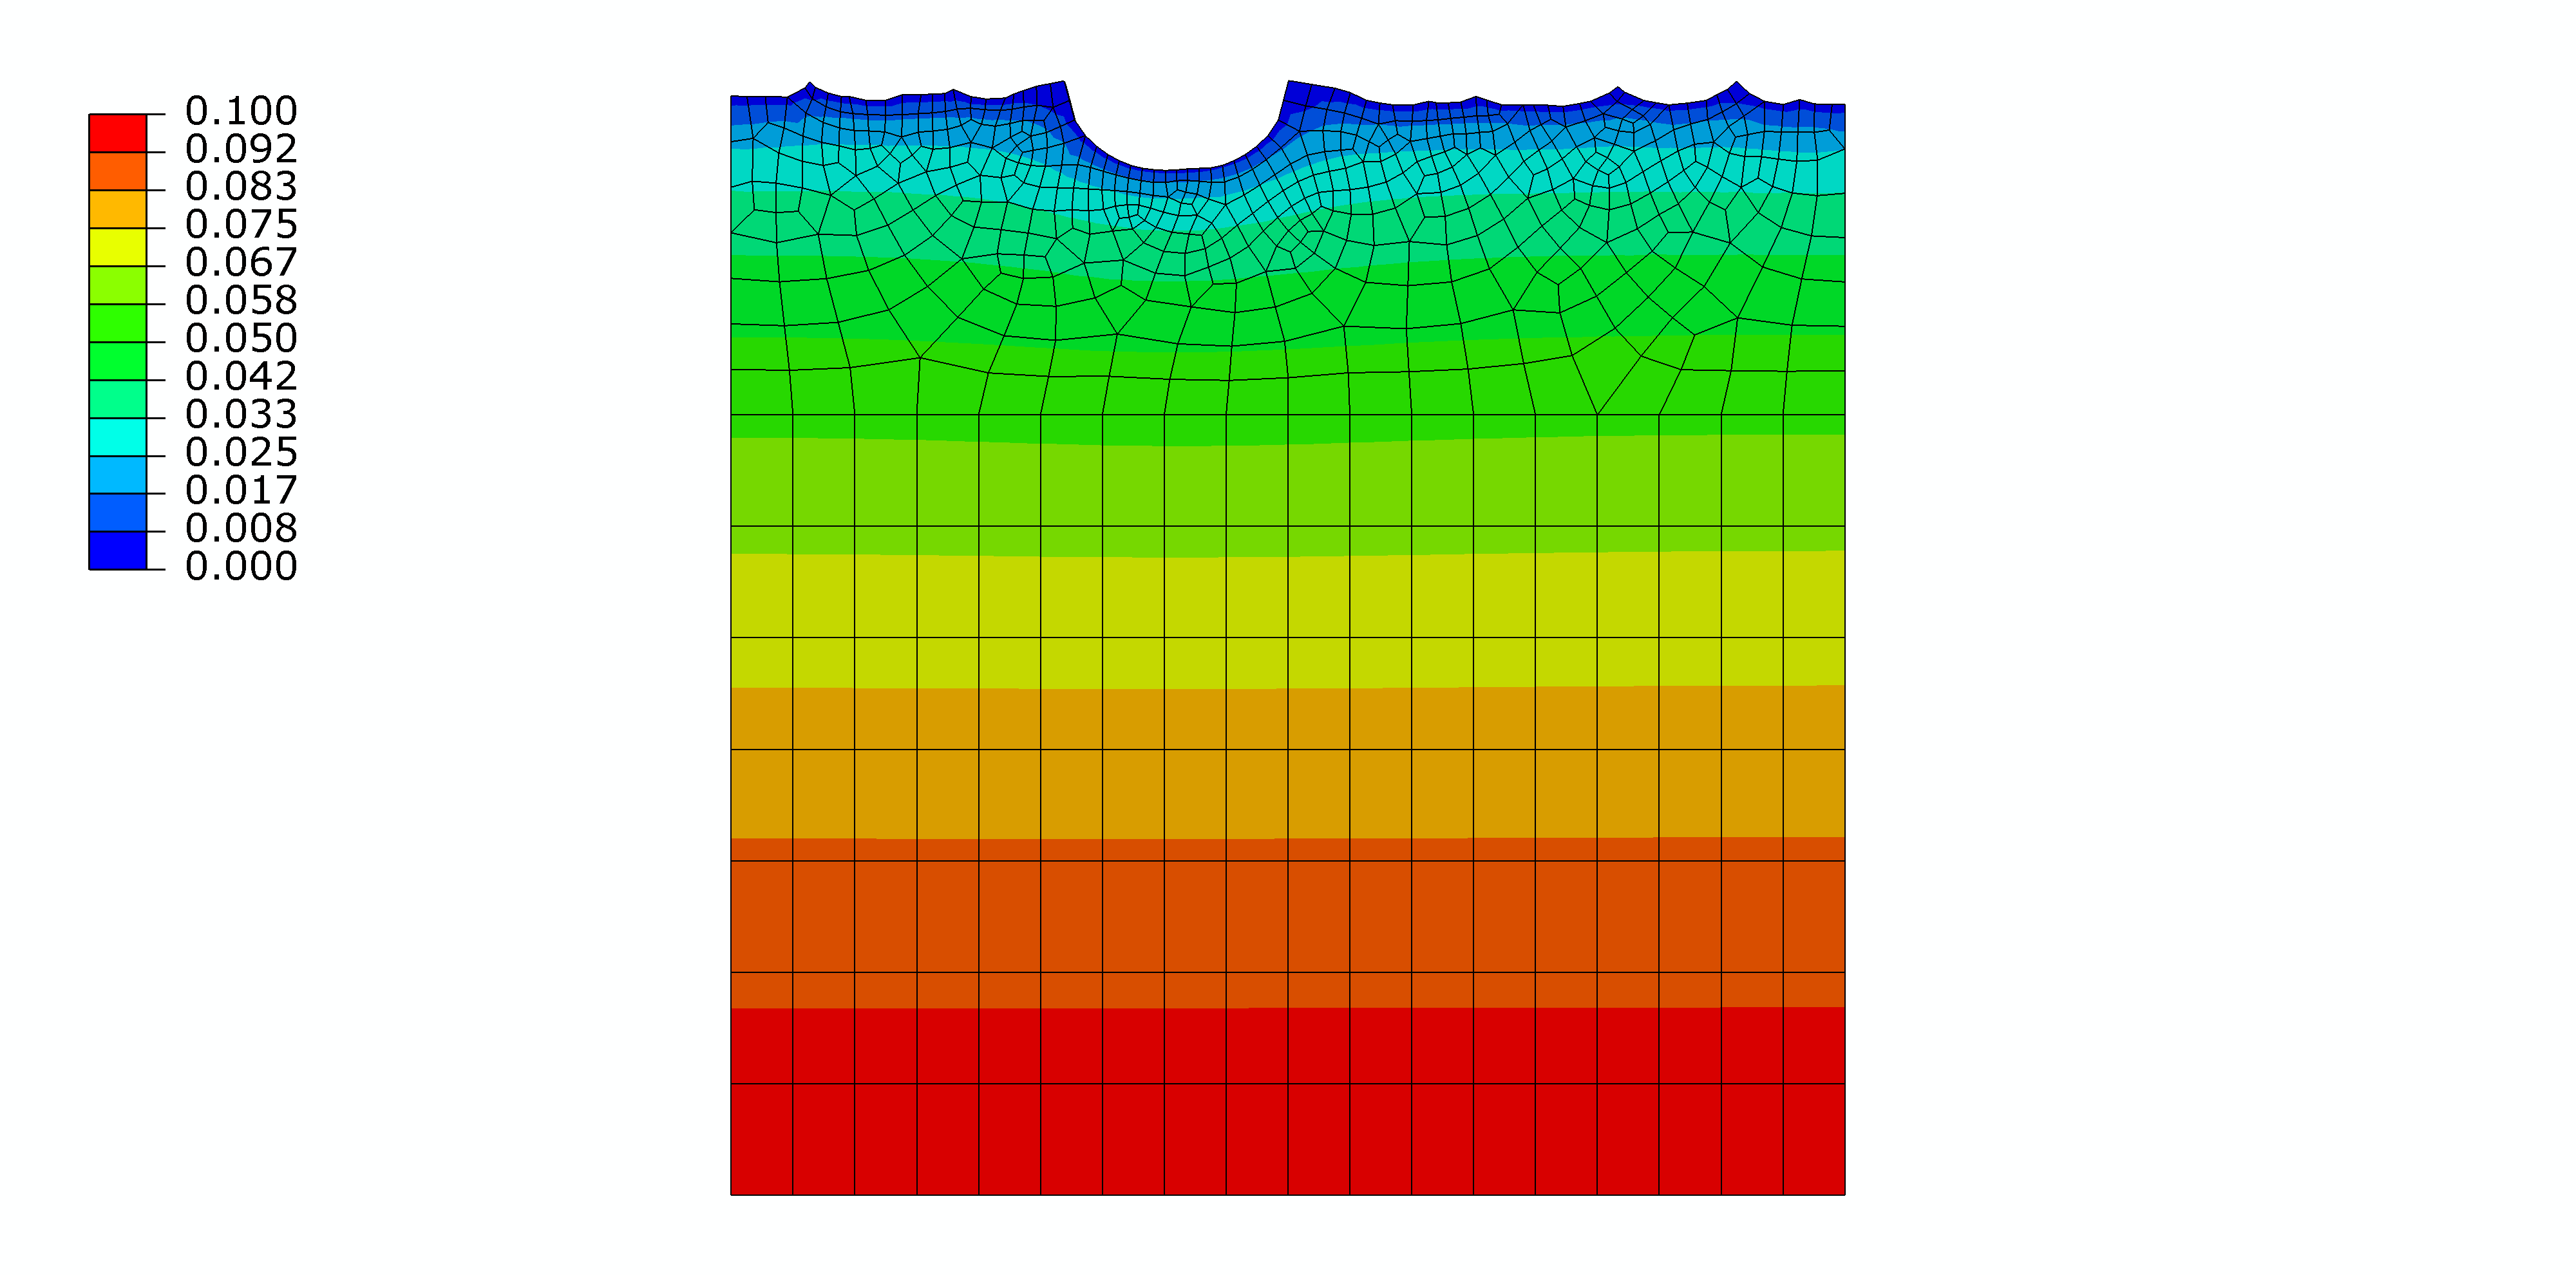

Supplement: s1 [file s1 › Video S5.gif]

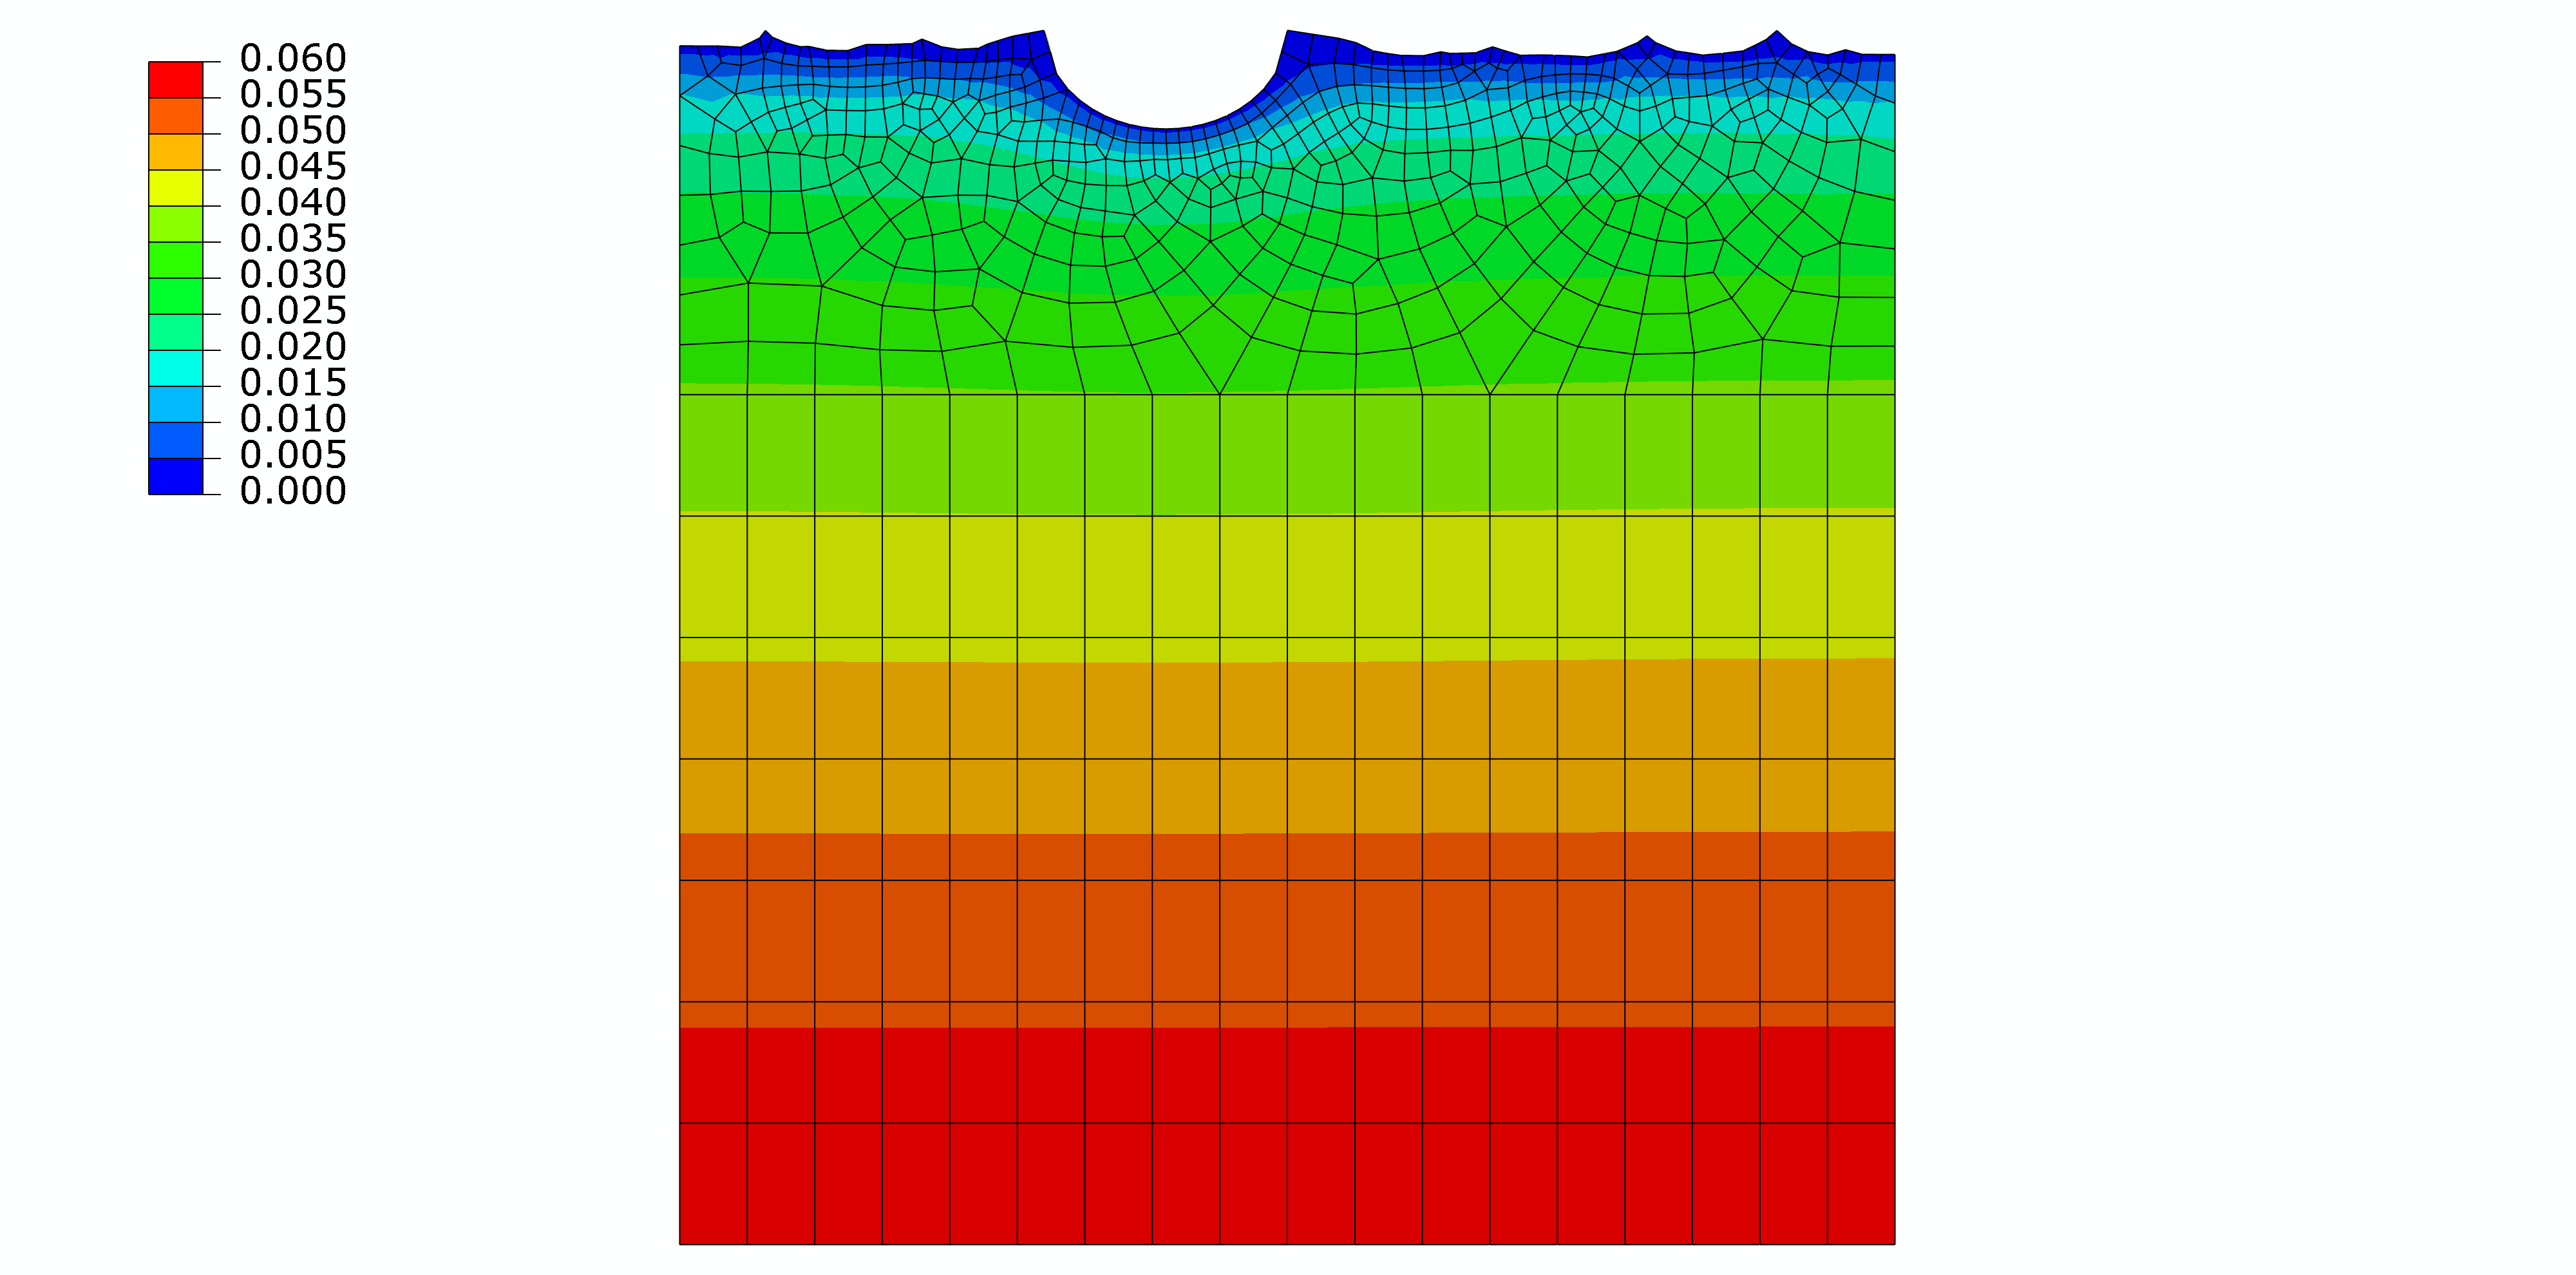

Supplement: s1 [file s1 › Video S6.gif]
